# Supplementary material
Source: PubMed Central journal article supplement (PMC3503161)
Supplement: 1209451109_pnas.201209451SI.pdf [file 1209451109_pnas.201209451SI.pdf]

# Supporting Information

Wilkinson et al. 10.1073/pnas.1209451109

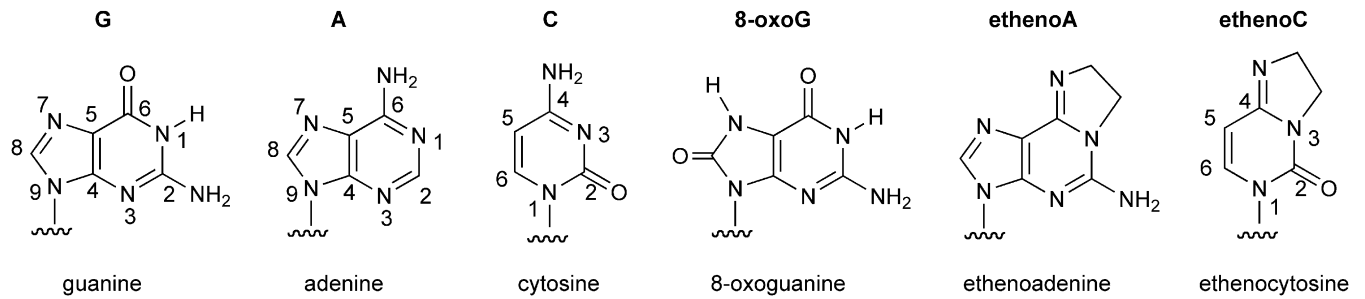

Fig. S1. Structures of selected natural and damaged bases in DNA.

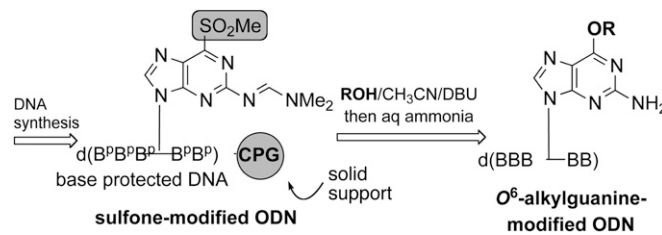

Fig. S2. Post-DNA synthesis modification of oligodeoxyribonucleotides (ODNs) to incorporate O<sup>6</sup>-alkylguanine analogs [replacement of alcohol (ROH) with an amine gives a 2,6-diaminopurine analog].

1) **At1**

2) **TTHA1564**

1) MRMDEFYTKVYDAVCEIPYGVST**Y**GEIARYVGMPSY**R**QVGGAMKHLHPETHV**PWHR**V 59

2) --LSPARLRLYERVLVPYGR**T**VS**Y**GALGRELGLSP--**R**AVGAALRACPFLLV**PAHR**V 120

1) INSRGTISK**R**DISAGEQRQKDRLEEEGVVEIYQTSLG EYKLNLP EYMWKP 108

2) IHADGRLGG**R**QGEGLKLWLLRFEGA----- 146

Fig. S3. Sequence alignment of alkyltransferase-like (ATL) protein homologs At1 from *Schizosaccharomyces pombe* and TTHA1564 from *Thermus thermophilus* generated using Sequoia (1). The highlighted amino acids correspond to the key residues discussed in the main text.

1. Bruns CM, Hubatsch I, Ridderström M, Mannervik B, Tainer JA (1999) Human glutathione transferase A4-4 crystal structures and mutagenesis reveal the basis of high catalytic efficiency with toxic lipid peroxidation products. *J Mol Biol* 288(3):427-439.

**Table S1. Binding data for complexes of ATL proteins with SIMA(HEX)-d(GCCATGXCTAGTA) determined using fluorescence emission intensity measurements**

| Modified base (X)                                 | Atl1       |                           |                     |
|---------------------------------------------------|------------|---------------------------|---------------------|
|                                                   | $K_D$ (nM) | $\Delta\Delta G$ (kJ/mol) | TTHA1564 $K_D$ (nM) |
| $O^6$ -benzylguanine (BnG)                        | 0.3 ± 0.01 | -19.4                     | 1.6 ± 0.15          |
| $O^6$ -propylguanine (PrG)                        | 0.4 ± 0.02 | -18.7                     | 1.8 ± 0.14          |
| $O^6$ -methyladamantylguanine (MAG)               | 0.6 ± 0.03 | -17.9                     | 1.9 ± 0.18          |
| $O^6$ -hydroxyethylguanine (HOEtG)                | 0.7 ± 0.04 | -17.2                     | 1.9 ± 0.09          |
| $O^6$ -aminoethylguanine (AEG)                    | 1.0 ± 0.02 | -16.4                     | 3.6 ± 0.13          |
| $O^6$ -ethylguanine (EtG)                         | 1.1 ± 0.12 | -16.2                     | 1.7 ± 0.17          |
| $O^6$ -pyridyloxobutylguanine (PobG)              | 1.1 ± 0.02 | -16.1                     | 1.8 ± 0.10          |
| $N^6$ -hydroxypropyl-2,6-diaminopurine (HOPr-DAP) | 1.1 ± 0.14 | -16.1                     | 3.0 ± 0.22          |
| $O^6$ -carboxymethylguanine (CMG)                 | 2.2 ± 0.06 | -14.4                     | 3.6 ± 0.03          |
| $O^6$ -methylguanine (MeG)                        | 2.4 ± 0.12 | -14.2                     | 1.2 ± 0.13          |
| 2,6-diaminopurine (DAP)                           | 4.9 ± 0.25 | -12.5                     | 8.4 ± 0.65          |
| 2-aminopurine (2-AP)                              | 9.3 ± 0.09 | -10.9                     | 7.5 ± 0.46          |
| $O^6$ -methylhypoxanthine (MeHx)                  | 370 ± 13   | -1.7                      | 21 ± 2.2            |
| Guanine (G)                                       | 740 ± 91   | 0                         | 103 ± 2.0           |

$K_D$  values (nM) determined in triplicate ± SEM. All binding data were determined at 298K.  $\Delta\Delta G$  values were calculated using the following equation:  $\Delta\Delta G = -RT\ln(K_D(\text{guanine})/K_D(\text{purine analog}))$ . Structures of all analogs are shown in Fig. 1A.

**Table S2. Crystallographic diffraction data collection and refinement statistics**

| Parameter                              | Atl1-DAP             | Atl1-2-AP             |
|----------------------------------------|----------------------|-----------------------|
| Data collection                        |                      |                       |
| Space group                            | P6 <sub>1</sub> 22   | P6 <sub>1</sub> 22    |
| Cell dimensions                        |                      |                       |
| <i>a</i> , <i>b</i> , <i>c</i> (Å)     | 59.50, 59.50, 237.35 | 59.98, 59.98, 235.49  |
| $\alpha$ , $\beta$ , $\gamma$ (°)      | 90.00, 90.00, 120.00 | 90.00, 90.00, 120.00  |
| Resolution (Å)                         | 50.0–2.7 (2.8–2.7)*  | 50.0–2.85 (2.95–2.85) |
| $R_{\text{sym}}$ or $R_{\text{merge}}$ | 5.6 (40.5)           | 4.8 (36.9)            |
| $I/\sigma I$                           | 74.4 (9.6)           | 83.6 (12.2)           |
| Completeness (%)                       | 99.9 (100.0)         | 99.8 (100.0)          |
| Redundancy                             | 26.2 (27.6)          | 19.9 (20.9)           |
| Protein Data Bank code                 | 4HDV                 | 4HDU                  |
| Refinement                             |                      |                       |
| Resolution (Å)                         | 43.2–2.7             | 34.9–2.85             |
| No. reflections                        | 7353                 | 6352                  |
| $R_{\text{work}}/R_{\text{free}}$      | 21.1/26.6            | 20.5/27.6             |
| No. atoms                              |                      |                       |
| Protein                                | 897                  | 900                   |
| Ligand/ion                             | 527                  | 526                   |
| Water                                  | 1                    | 0                     |
| <i>B</i> -factors                      |                      |                       |
| Protein                                | 51.3                 | 66.5                  |
| Ligand/ion                             | 56.4                 | 67.8                  |
| Water                                  | 35.3                 | N/A                   |
| rmsds                                  |                      |                       |
| Bond lengths (Å)                       | 0.012                | 0.012                 |
| Bond angles (°)                        | 1.294                | 1.346                 |

Data were collected using a single crystal.

\*Values in parentheses are for highest-resolution shell.

**Table S3.  $K_D$  values for complexes of At1 wild-type and mutant proteins with SIMA(HEX)-d(GCCATGXCTAGTA) determined using fluorescence emission intensity measurements**

| Modified base (X)                            | At1 wild type $K_D$ (nM) | At1 R69F $K_D$ (nM) | At1 R69A $K_D$ (nM) |
|----------------------------------------------|--------------------------|---------------------|---------------------|
| O <sup>6</sup> -benzylguanine (BnG)          | 0.3 ± 0.01               | 1.6 ± 0.12          | 14 ± 2.3            |
| O <sup>6</sup> -methyladamantylguanine (MAG) | 0.6 ± 0.03               | 2.3 ± 0.10          | 16 ± 2.8            |
| O <sup>6</sup> -methylguanine (MeG)          | 2.4 ± 0.12               | 35 ± 6              | 96 ± 1              |
| 2,6-diaminopurine (DAP)                      | 4.9 ± 0.25               | 79 ± 15             | 240 ± 5             |
| 2-aminopurine (2-AP)                         | 9.3 ± 0.09               | 196 ± 3             | 560 ± 47            |
| Guanine (G)                                  | 740 ± 91                 | 755 ± 12            | 135 ± 16            |

$K_D$  values (nM) determined in triplicate ± SEM. All binding data were determined at 298K. Structures of all analogs are shown in Fig. 1A.

**Table S4. Calculated and observed mass ions for the modified ODNs SIMA(HEX)-d(GCCATGXCTAGTA) used in this study determined using ESI-mass spectrometry**

| O <sup>6</sup> -modification/purine | Calculated mass (Da) | Determined mass (Da) |
|-------------------------------------|----------------------|----------------------|
| None (G)                            | 4,733                | 4,733                |
| Methyl                              | 4,747                | 4,748                |
| Ethyl                               | 4,761                | 4,761                |
| Propyl                              | 4,775                | 4,775                |
| Benzyl                              | 4,823                | 4,823                |
| Hydroxyethyl                        | 4,777                | 4,777                |
| N <sup>6</sup> -Hydroxypropyl-DAP   | 4,790                | 4,790                |
| Pyridyloxobutyl                     | 4,880                | 4,880                |
| Carboxymethyl                       | 4,791                | 4,791                |
| Aminoethyl                          | 4,776                | 4,776                |
| Methyladamantyl                     | 4,881                | 4,881                |
| DAP                                 | 4,732                | 4,732                |

**Table S5. List of *S. pombe* strains used in study**

| Name  | Genotypes                                                |
|-------|----------------------------------------------------------|
| GM1   | <i>h+ leu1-32 ura4-D18 his7-366 ade6-M210</i>            |
| GM3   | <i>h+ leu1-32 ura4-D18 his7-366 ade6-M210 at1Δ::ura4</i> |
| GM177 | <i>h+ leu1-32 ura4-D18 his7-366 ade6-M210 at1-R69A</i>   |
| GM178 | <i>h+ leu1-32 ura4-D18 his7-366 ade6-M210 at1-R69F</i>   |
